# Supplementary material for: Usability Evaluation of a Mobile Phone–Based System for Remote Monitoring and Management of Chemotherapy-Related Side Effects in Cancer Patients: Mixed-Methods Study
Source: PubMed Central journal article supplement (PMC6320433; doi:10.2196/10932), 2018-12-21

# ASyMS monitoring system

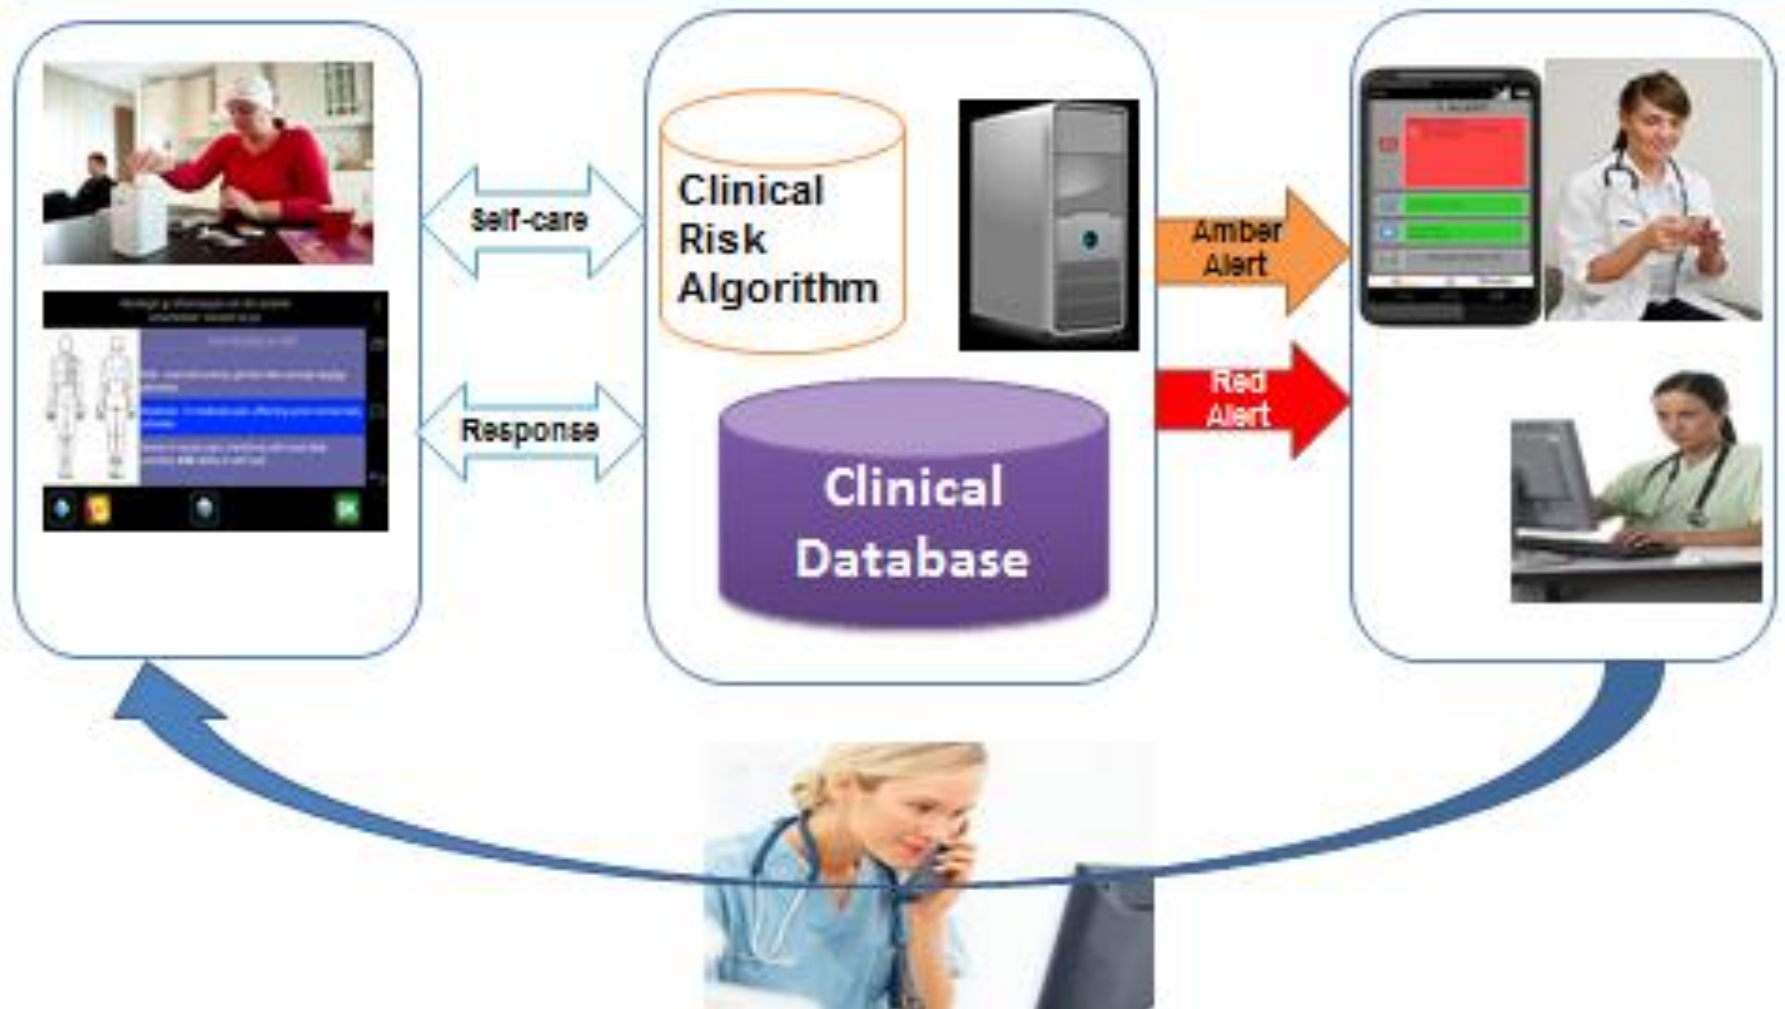

Supplement: cancer_v4i2e10932_app1.pdf [file cancer_v4i2e10932_app1.pdf]
