# Supplementary material for: Usability Evaluation of a Mobile Phone–Based System for Remote Monitoring and Management of Chemotherapy-Related Side Effects in Cancer Patients: Mixed-Methods Study
Source: PubMed Central journal article supplement (PMC6320433; doi:10.2196/10932), 2018-12-21
Supplement: cancer_v4i2e10932_app3.pdf [file cancer_v4i2e10932_app3.pdf]

### Appendix 3: ASYMS Acceptance Measure

(For patients participating in usability test)

To be completed by participants

|                                                                                                                                                                           |   |   |   |   |   |   |   |                |
|---------------------------------------------------------------------------------------------------------------------------------------------------------------------------|---|---|---|---|---|---|---|----------------|
| <p>These questions are asking you for your thoughts and feelings about ASYMS.<br/>Please <u>circle</u> the number which represents how you feel about each statement.</p> |   |   |   |   |   |   |   |                |
| 1- I intend to use ASYMS                                                                                                                                                  |   |   |   |   |   |   |   |                |
| Definitely do not                                                                                                                                                         | 1 | 2 | 3 | 4 | 5 | 6 | 7 | Definitely do  |
| 2- I believe I have the ability to use ASYMS                                                                                                                              |   |   |   |   |   |   |   |                |
| Definitely do not                                                                                                                                                         | 1 | 2 | 3 | 4 | 5 | 6 | 7 | Definitely do  |
| 3- I want to use ASYMS                                                                                                                                                    |   |   |   |   |   |   |   |                |
| Definitely do not                                                                                                                                                         | 1 | 2 | 3 | 4 | 5 | 6 | 7 | Definitely do  |
| 4- How likely is it that you will use ASYMS?                                                                                                                              |   |   |   |   |   |   |   |                |
| Very unlikely                                                                                                                                                             | 1 | 2 | 3 | 4 | 5 | 6 | 7 | Very likely    |
| 5- My using ASYMS is/ would be...                                                                                                                                         |   |   |   |   |   |   |   |                |
| Difficult                                                                                                                                                                 | 1 | 2 | 3 | 4 | 5 | 6 | 7 | Easy           |
| 6- How confident are you that you will be able to use ASYMS?                                                                                                              |   |   |   |   |   |   |   |                |
| Not very confident                                                                                                                                                        | 1 | 2 | 3 | 4 | 5 | 6 | 7 | Very confident |
| 7- Most people who are important to me approve/ would approve of my using ASYMS                                                                                           |   |   |   |   |   |   |   |                |
| Strongly disagree                                                                                                                                                         | 1 | 2 | 3 | 4 | 5 | 6 | 7 | Strongly agree |
| 8- People who are important to me want me to use ASYMS                                                                                                                    |   |   |   |   |   |   |   |                |
| Strongly disagree                                                                                                                                                         | 1 | 2 | 3 | 4 | 5 | 6 | 7 | Strongly agree |
| 9- The ASyMS mobile device will help me manage my chemotherapy toxicities more effectively                                                                                |   |   |   |   |   |   |   |                |
|                                                                                                                                                                           |   |   |   |   |   |   |   |                |
| Strongly disagree                                                                                                                                                         | 1 | 2 | 3 | 4 | 5 | 6 | 7 | Strongly agree |
| 10- I found the information and self-care advice that I have received to be worthwhile.                                                                                   |   |   |   |   |   |   |   |                |
| Strongly disagree                                                                                                                                                         | 1 | 2 | 3 | 4 | 5 | 6 | 7 | Strongly agree |
| 11- I would recommend this system to be used for patients receiving chemotherapy.                                                                                         |   |   |   |   |   |   |   |                |

|                                                                                                   |   |   |   |   |   |   |   |                |
|---------------------------------------------------------------------------------------------------|---|---|---|---|---|---|---|----------------|
| Strongly disagree                                                                                 | 1 | 2 | 3 | 4 | 5 | 6 | 7 | Strongly agree |
| 12- Overall, my attitude towards using ASYMS is: ( <i>please circle one number on each line</i> ) |   |   |   |   |   |   |   |                |
| Negative                                                                                          | 1 | 2 | 3 | 4 | 5 | 6 | 7 | Positive       |
| Anti                                                                                              | 1 | 2 | 3 | 4 | 5 | 6 | 7 | Pro            |
| Bad                                                                                               | 1 | 2 | 3 | 4 | 5 | 6 | 7 | Good           |
